# Supplementary material for: Solvent effects on the motion of a crown ether/amino rotaxane
Source: Royal Society of Chemistry journal article supplement (doi:10.1039/d2ra05453a), 2022-01-01
Supplement: d2ra05453a1.pdf [file d2ra05453a1.pdf]

# Solvent Effects on the Motion of a Crown Ether/Amino Rotaxane

Zhen Wu,<sup>a</sup> Shuangshuang Wang,<sup>\*b</sup> Zilin Zhang,<sup>b</sup> Yanjun Zhang,<sup>b</sup> Yanzhen Yin,<sup>\*b</sup> Haixin Shi<sup>b</sup> and Shufei Jiao<sup>b</sup>

<sup>a</sup> School of Chemistry and Chemical Engineering, Guangxi University, Nanning 530004, China

<sup>b</sup> Guangxi Key Laboratory of Green Chemical Materials and Safety Technology, Beibu Gulf University, Qinzhou 535011, China

\* Corresponding authors. Email address: doublewang123@163.com; yinyanzhen2009@163.com

**Table S1.** Detail of the molecular assemblies examined in this study.

| Solvent         | Number of atoms | Number of solvent molecules | Size of the simulation box ( $\text{\AA}^3$ ) | Simulation time ( $\mu\text{s}$ ) |
|-----------------|-----------------|-----------------------------|-----------------------------------------------|-----------------------------------|
| $\text{CHCl}_3$ | 11160           | 2194                        | $65 \times 50 \times 76$                      | 2.7                               |
| water           | 25906           | 8572                        | $66 \times 49 \times 75$                      | 2.8                               |

The force-field parameters of the axle and the C[8] came from the widely used CHARMM general force field (CGenFF), which included bonded, non-bonded, atomic charges, and VDW parameters. The molecule topologies were generated from the online CGenFF program (<https://cgenff.umaryland.edu>).<sup>1,2</sup> The detailed parameters are shown in the following tables.

### The axle

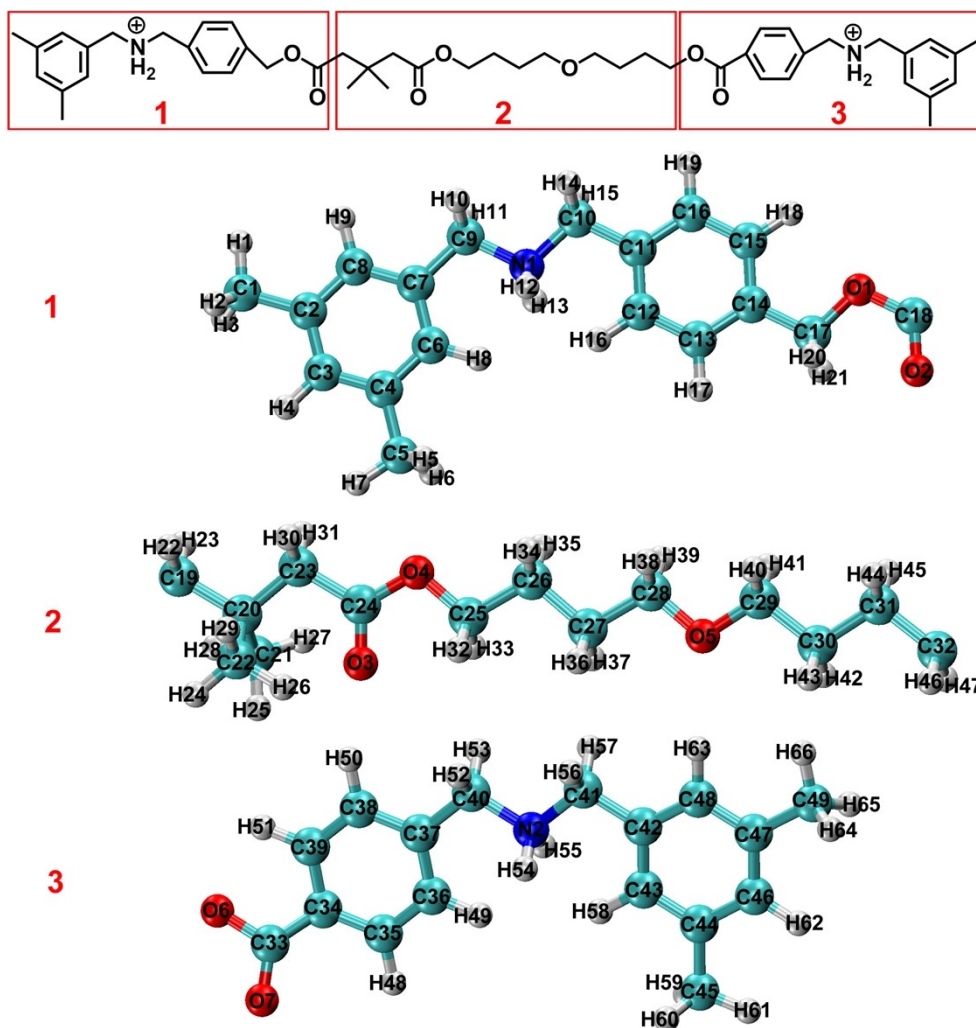

**Table S2.** The charge distributions of the axle.

| ATOM | CHARGE | ATOM | CHARGE |
|------|--------|------|--------|
| C1   | -0.269 | H5   | 0.090  |
| C2   | 0      | H6   | 0.090  |
| C3   | -0.117 | H7   | 0.090  |
| C4   | 0      | H8   | 0.115  |
| C5   | -0.269 | H9   | 0.115  |
| C6   | -0.116 | H10  | 0.090  |
| C7   | 0.093  | H11  | 0.090  |
| C8   | -0.116 | H12  | 0.330  |
| C9   | 0.127  | H13  | 0.330  |
| N1   | -0.456 | H14  | 0.090  |
| C10  | 0.127  | H15  | 0.090  |
| C11  | 0.091  | H16  | 0.115  |
| O12  | -0.108 | H17  | 0.115  |
| C13  | -0.117 | H18  | 0.115  |
| C14  | -0.006 | H19  | 0.115  |
| C15  | -0.117 | H20  | 0.090  |
| C16  | -0.108 | H21  | 0.090  |
| C17  | 0.064  | H22  | 0.090  |
| O1   | -0.477 | H23  | 0.090  |
| C18  | 0.902  | H24  | 0.090  |
| O2   | -0.632 | H25  | 0.090  |
| C19  | -0.224 | H26  | 0.090  |
| C20  | 0.016  | H27  | 0.090  |
| C21  | -0.275 | H28  | 0.090  |
| C22  | -0.275 | H29  | 0.090  |
| C23  | -0.224 | H30  | 0.090  |
| C24  | 0.902  | H31  | 0.090  |
| O3   | -0.632 | H32  | 0.090  |
| O4   | -0.489 | H33  | 0.090  |
| C25  | 0.081  | H34  | 0.090  |
| C26  | -0.180 | H35  | 0.090  |
| C27  | -0.182 | H36  | 0.090  |
| C28  | 0.010  | H37  | 0.090  |
| O5   | -0.338 | H38  | 0.090  |
| C29  | -0.010 | H39  | 0.090  |
| C30  | -0.182 | H40  | 0.090  |
| C31  | -0.180 | H41  | 0.090  |
| C32  | 0.059  | H42  | 0.090  |

---

| ATOM | CHARGE | ATOM | CHARGE |
|------|--------|------|--------|
| O6   | -0.305 | H43  | 0.090  |
| O7   | -0.493 | H44  | 0.090  |
| C33  | 0.471  | H45  | 0.090  |
| C34  | 0.083  | H46  | 0.090  |
| C35  | -0.112 | H47  | 0.090  |
| C36  | -0.115 | H48  | 0.115  |
| C37  | 0.091  | H49  | 0.115  |
| C38  | -0.115 | H50  | 0.115  |
| C39  | -0.112 | H51  | 0.115  |
| C40  | 0.127  | H52  | 0.090  |
| N2   | -0.456 | H53  | 0.090  |
| C41  | 0.127  | H54  | 0.330  |
| C42  | 0.093  | H55  | 0.330  |
| C43  | -0.116 | H56  | 0.090  |
| C44  | 0      | H57  | 0.090  |
| C45  | -0.269 | H58  | 0.115  |
| C46  | -0.117 | H59  | 0.090  |
| C47  | 0      | H60  | 0.090  |
| C48  | -0.116 | H61  | 0.090  |
| C49  | -0.269 | H62  | 0.115  |
| H1   | 0.090  | H63  | 0.115  |
| H2   | 0.090  | H64  | 0.090  |
| H3   | 0.090  | H65  | 0.090  |
| H4   | 0.115  | H66  | 0.090  |

---

The C[8]

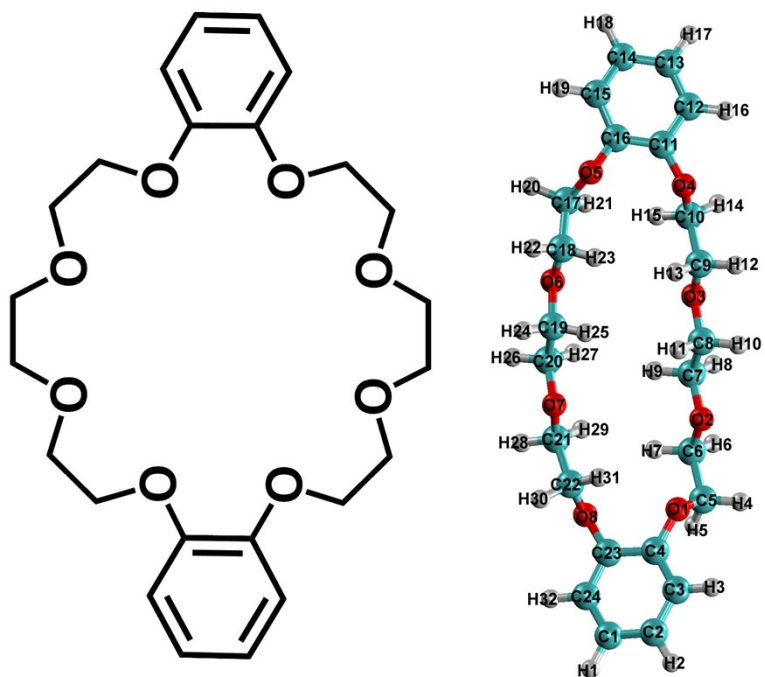

**Table S3.** The charge distributions of the C[8].

| ATOM | CHARGE | ATOM | CHARGE |
|------|--------|------|--------|
| C1   | -0.114 | H1   | 0.115  |
| C1   | -0.114 | H2   | 0.115  |
| C2   | -0.114 | H3   | 0.115  |
| C3   | 0.219  | H4   | 0.090  |
| C4   | -0.390 | H5   | 0.090  |
| O1   | -0.011 | H6   | 0.090  |
| C5   | -0.011 | H7   | 0.090  |
| C6   | -0.011 | H8   | 0.090  |
| C7   | -0.338 | H9   | 0.090  |
| O2   | -0.011 | H10  | 0.090  |
| C8   | -0.338 | H11  | 0.090  |
| O3   | -0.011 | H12  | 0.090  |
| C9   | -0.011 | H13  | 0.090  |
| C10  | -0.390 | H14  | 0.090  |
| O4   | 0.219  | H15  | 0.090  |
| C11  | -0.014 | H16  | 0.115  |
| C12  | -0.114 | H17  | 0.115  |
| C13  | -0.114 | H18  | 0.115  |
| C14  | -0.114 | H19  | 0.115  |
| C15  | -0.114 | H20  | 0.090  |

| ATOM | CHARGE | ATOM | CHARGE |
|------|--------|------|--------|
| C16  | 0.219  | H21  | 0.090  |
| O5   | -0.390 | H22  | 0.090  |
| C17  | -0.011 | H23  | 0.090  |
| C18  | -0.011 | H24  | 0.090  |
| O6   | -0.338 | H25  | 0.090  |
| C19  | -0.011 | H26  | 0.090  |
| C20  | -0.011 | H27  | 0.090  |
| O7   | -0.338 | H28  | 0.090  |
| C21  | -0.011 | H29  | 0.090  |
| C22  | -0.011 | H30  | 0.090  |
| O8   | -0.390 | H31  | 0.090  |
| C23  | 0.219  | H32  | 0.115  |
| C24  | -0.114 |      |        |

## Simulation details

### 1. Molecular Dynamics Simulations

NAMD<sup>3</sup> with the CHARMM 36 general force field (CGenFF)<sup>2</sup> were used for performing all the atomistic MDS. The rigid model of Dietz and Heinzinger (DH model),<sup>4</sup> which was merged into the CgenFF, was used to express CHCl<sub>3</sub>. The TIP3P water model<sup>5</sup> were employed for representing water. The details of the charge distributions of the axle and the C[8] were demonstrated in Table S2 and S3. Covalent bonds involving hydrogen atoms were restrained to their equilibrium lengths by applying the SHAKE/RATTLE<sup>6,7</sup> and SETTLE algorithms.<sup>8</sup> The temperature was controlled at 198 K by using the Langevin dynamics<sup>9</sup> and the pressure was kept at 1 atm by adopting the Langevin piston method.<sup>9</sup> The r-RESPA multiple time step algorithm<sup>10</sup> was utilized to integrate the equations of motion with a time step of 4 and 2 fs for long- and short-range interactions, respectively. Long-range electrostatic forces were evaluated by use of the particle-mesh Ewald method,<sup>11</sup> and short-range van der Waals and electrostatic interactions were cut off by means of a smoothed 12.0 Å spherical bound. Visualization and analysis of the molecular dynamics trajectories were performed with the VMD program.<sup>12</sup>

### 2. Free-energy calculations

All the free-energy calculations were performed using the Colvars<sup>13</sup> module in NAMD. Well-tempered meta-eABF (WTM-eABF)<sup>14,15</sup> was employed to enhance sampling along the transition coordinate. The corrected  $z$ -averaged restraint (CZAR) estimator<sup>16</sup> was used to calculate the unbiased free energy landscapes and the MULE algorithm<sup>17</sup> was adopted to identify the lowest free-energy pathways. The variation of the free energy,  $\Delta G(\zeta, d)$ , was determined by integrating the average force acting concomitantly on  $\zeta$  and  $d$ . To avoid spurious folding of the axle, the backbone of the rotaxane was softly restrained to its extended conformation during the MDS. A soft harmonic potential was also used to prevent the chloride ions from approaching the rotaxane. Before implement the free-energy calculation, a 20 ns equilibrium MDS were performed for each solvated system. The total simulation time amounted to 2.7 and 2.8  $\mu$ s for the rotaxane, respectively, in CHCl<sub>3</sub> and water.

## References

- 1 R. J. Ferreira, P. M. Kasson, *ACS. Infect. Dis.* 2019, **5**, 2096–2104.
- 2 K. Vanommeslaeghe, E. Hatcher, C. Acharya, S. Kundu, S. Zhong, J. Shim, E. Darian, O. Guvench, P. Lopes, I. Vorobyov and A. D. Mackerell, *J. Comput. Chem.*, 2010, **31**, 671-690.
- 3 J. C. Phillips, D. J. Hardy, J. D. C. Maia, J. E. Stone, J. V. Ribeiro, R. C. Bernardi, R. Buch, G. Fiorin, J. Hémin, W. Jiang, R. McGreevy, M. C. R. Melo, B. K. Radak, R. D. Skeel, A. Singharoy, Y. Wang, B. Roux, A.

- Aksimentiev, Z. Luthey-Schulten, L. V. Kalé, K. Schulten, C. Chipot and E. Tajkhorshid, *J. Chem. Phys.*, 2020, **153**, 44130.
- 4 W. Dietz, K. Heinzinger, *Ber. Bunsenges. Phys. Chem.* 1985, **89**, 968–977.
  - 5 W. L. Jorgensen, J. Chandrasekhar, J. D. Madura, R. W. Impey and M. L. Klein, *J. Chem. Phys.*, 1983, **79**, 926–935.
  - 6 H. C. Andersen, *J. Comput. Phys.* 1983, **52**, 24–34.
  - 7 J. P. Ryckaert, G. Ciccotti and H. J. C. Berendsen, *J. Comput. Phys.*, 1977, **23**, 327–341.
  - 8 S. Miyamoto, P. A. Kollman, *J. Comput. Chem.* 1992, **13**, 952–962.
  - 9 S. E. Feller, Y. Zhang, R. W. Pastor and B. R. Brooks, *J. Chem. Phys.*, 1995, **103**, 4613–4621.
  - 10 M. Tuckerman, B. J. Berne and G. J. Martyna, *J. Chem. Phys.*, 1992, **97**, 1990–2001.
  - 11 T. Darden, D. York and L. Pedersen, *J. Chem. Phys.*, 1993, **98**, 10089–10092.
  - 12 W. Humphrey, A. Dalke and K. Schulten, *J. Mol. Graph.* 1996, **14**, 33–38.
  - 13 G. Fiorin, M. L. Klein and J. Hénin, *Mol. Phys.*, 2013, **111**, 3345–3362.
  - 14 H. H. Fu, X. G. Shao, W. S. Cai and C. Chipot, *Acc. Chem. Res.*, 2019, **52**, 3254–3264.
  - 15 H. H. Fu, H. Zhang, H. C. Chen, X. G. Shao, C. Chipot and W. S. Cai, *J. Phys. Chem. Lett.*, 2018, **9**, 4738–4745.
  - 16 A. Lesage, T. Lelièvre, G. Stoltz and J. Hénin, *J. Phys. Chem. B*, 2017, **121**, 3676–3685.
  - 17 H. H. Fu, H. C. Chen, X. A. Wang, H. Chai, X. G. Shao, W. S. Cai and C. Chipot, *J. Chem. Inf. Model.*, 2020, **60**, 5366–5374.
